# Supplementary material for: Correlation between anti-retinal antibodies and lupus retinopathy in systemic lupus erythematosus
Source: Sci Rep. 2026 Mar 13;16:13439. doi: 10.1038/s41598-026-44125-z (PMC13111583; doi:10.1038/s41598-026-44125-z)
Supplement: Supplementary file 1 — Supplementary Material 1 [file 41598_2026_44125_MOESM1_ESM.xlsx]

## Sheet: anti-alpha-enolase
group	anti-alpha-enolase	ng/ml
1	9.98948
1	10.2109
1	11.9381
1	11.0966
1	10.3438
1	10.2552
1	13.0452
1	9.85663
1	12.2038
1	8.79376
1	14.5509
1	14.5952
1	9.01519
1	13.3995
1	10.2552
1	12.8681
1	12.4695
1	11.8495
1	15.0824
1	13.3995
2	5.85664
1	13.8867
1	14.9495
1	13.5324
1	9.05948
1	12.4695
1	13.3552
1	11.2295
1	13.1338
1	13.0452
1	9.45805
1	15.0381
1	10.1666
1	14.2852
1	14.5067
2	8.05951
2	8.19237
2	9.16666
2	9.87523
2	11.2924
2	7.57236
2	9.56523
2	8.54665
2	10.0967
2	13.7724
2	9.87523
2	2.87805
2	10.4952
2	10.2295
2	8.28094
2	9.60952
2	8.54665
2	6.1995
2	17.5367
2	15.9424
2	6.24378
2	12.0895
2	11.6467
2	11.4252
2	7.79379
2	6.5095
2	11.8238
2	12.1781
2	5.75664
2	12.7095
2	11.691
2	17.0496
2	2.12518
2	11.7352
2	4.82663
2	10.5395
2	14.791
2	11.381
2	13.6395
2	11.9124
2	15.8981
2	6.99664
2	16.031
2	15.4553
2	20.1939
2	14.9238
2	13.3295
2	5.00377
2	4.56091
3	5.68354
3	7.19519
3	3.88846
3	5.40011
3	6.959
3	7.00623
3	7.28967
3	8.47064
3	4.69152
3	7.14795
3	8.84856
3	5.06944
3	6.81728
3	7.95101
3	8.13997
3	7.62034
3	11.7774
3	9.22647
3	7.8093
3	9.41542
3	9.41542
3	6.48661
3	9.69886
3	10.313
3	7.85654
3	9.60438
3	10.313
3	9.36818
3	9.93505
3	9.5099
3	3.87488
3	5.42568
3	3.98777
3	13.1024715
3	5.19395
3	5.08106
3	5.52669
3	8.59263
3	10.292
3	5.25931
3	16.1802
3	5.46133
3	5.19989
3	5.0157
3	5.95449
3	5.5564
3	4.78991
3	5.0157
3	8.5748
3	4.87309
3	4.79585
3	5.27119
3	4.70078
3	6.01391
3	10.6306
3	5.21772
3	5.35438
3	6.33476
3	12.633
3	5.23554
3	6.98836
3	5.59205
3	5.83566
3	6.97053
3	6.17434
3	6.1684

## Sheet: anti-arrestin
group	anti-arrestin	ng/L
1	4115.66
1	933.6
1	3565.88
1	2574.61
1	791.99
1	4465.52
1	6631.32
1	1866.56
1	3632.52
1	2249.74
1	2882.82
1	4207.29
1	1183.5
1	1891.55
1	2716.22
1	3515.9
1	841.97
1	2499.64
1	3007.77
1	1758.27
2	2108.13
1	5223.55
1	2674.57
1	1250.14
1	5773.33
1	1991.51
1	1533.36
1	1658.31
1	2399.68
1	2099.8
1	2291.39
1	1125.19
1	2524.63
1	2591.27
1	2308.05
2	2374.69
2	1958.19
2	2507.97
2	2616.26
2	1908.21
2	1458.39
2	3074.41
2	1941.53
2	1899.88
2	9313.58
2	4673.77
2	783.66
2	2507.97
2	2532.96
2	1558.35
2	2024.83
2	1924.87
2	2049.82
2	3274.33
2	3432.6
2	2224.75
2	1833.24
2	3974.05
2	1824.91
2	2016.5
2	825.31
2	1949.86
2	2119.53
2	3689.37
2	9524.86
2	9286.67
2	2135.77
2	7462.41
2	3516.15
2	3342.93
2	7949.6
2	3889.66
2	3310.45
2	3526.98
2	1908.42
2	6877.78
2	3283.38
2	3299.62
2	2871.97
2	5085.99
2	2341.47
2	8176.96
2	5026.45
2	1641.65
2	1075.21
3	3115.57
3	2401.02
3	1989.61
3	2644.62
3	2162.84
3	2503.87
3	2893.63
3	2379.37
3	2839.49
3	2725.82
3	2617.55
3	2790.77
3	2666.27
3	2704.16
3	2850.32
3	3191.36
3	6731.62
3	3570.28
3	2617.55
3	3786.81
3	3283.38
3	2568.83
3	2100.16
3	381.411
3	3766.2
3	4441.04
3	3639.66
3	4050.9
3	5168.61
3	2110.71
3	2785.56
3	803.191
3	3302.24
3	4883.91
3	1108.98
3	4240.7
3	4177.43
3	2173.98
3	2026.35
3	1520.22
3	2057.99
3	4198.52
3	2184.52
3	2532.49
3	4641.39
3	2766.2
3	2149.78
3	1791.59
3	2557.95
3	1933.2
3	983.58
3	4157.31
3	7564.28
3	2541.29
3	2399.68
3	2924.47
3	2549.62
3	1974.85
3	1983.18
3	2607.93
3	2408.01
3	7114.46
3	2591.27
3	2499.64
3	2124.79
3	1833.24
3	7203.7
3	6634.3
3	3818.92
3	4261.79
3	5442.77
3	6539.4
3	2817.19
3	7646.57
3	4367.23
3	4261.79
3	8890.82
3	5126.44
3	5252.97

## Sheet: anti-recoverin
group	anti-recoverin	微克/mL
1	301.778
1	219.766
1	304.402
1	266.349
1	184.336
1	320.8049
1	455.962
1	219.766
1	297.185
1	266.349
1	253.227
1	381.166
1	150.219
1	141.034
1	240.105
1	289.312
1	175.151
1	312.932
1	240.761
1	260.444
2	80.6723
1	407.41
1	253.883
1	126.599
1	422.5
1	205.987
1	169.902
1	188.273
1	199.426
1	192.209
1	262.412
1	177.775
1	319.493
1	243.385
1	204.019
2	255.195
2	298.497
2	255.195
2	253.227
2	388.383
2	237.48
2	284.719
2	248.634
2	273.566
2	144.97
2	226.326
2	213.861
2	233.544
2	223.702
2	254.539
2	209.268
2	427.093
2	265.036
2	181.712
2	41.3063
2	247.322
2	196.146
2	295.217
2	39.338
2	259.788
2	188.273
2	176.463
2	130.536
2	218.453
2	30.1526
2	196.146
2	200.082
2	55.7405
2	165.965
2	244.041
2	370.012
2	135.129
2	82.6406
2	220.422
2	396.256
2	219.766
2	201.395
2	229.607
2	99.0431
3	253.786
3	119.082
3	137.829
3	162.826
3	144.078
3	179.49
3	175.324
3	187.128
3	171.852
3	153.105
3	161.437
3	157.271
3	194.766
3	191.988
3	237.121
3	185.739
3	201.709
3	196.155
3	237.121
3	137.829
3	129.497
3	201.015
3	166.298
3	169.769
3	114.221
3	305.862
3	174.63
3	167.686
3	213.513
3	239.899
3	180.185
3	219.068
3	137.829
3	136.44
3	155.882
3	167.686
3	149.633
3	154.494
3	166.298
3	153.105
3	100.334
3	141.301
3	92.0021
3	116.304
3	216.291
3	241.982
3	211.43
3	171.852
3	169.075
3	155.188
3	198.238
3	229.483
3	166.992
3	190.6
3	253.091
3	196.849
3	148.244
3	196.155
3	126.72
3	176.713
3	173.241
3	217.679
3	293.364
3	194.766
3	155.882
3	279.477
3	221.151
3	303.084
3	165.603
3	264.895
3	229.483
3	211.43
3	218.374

## Sheet: anti-IRBP3
group	anti-IRBP3	ng/L
1	357.871
1	196.602
1	327.784
1	325.377
1	143.648
1	289.874
1	409.622
1	111.756
1	170.126
1	133.419
1	137.029
1	421.657
1	217.664
1	167.117
1	232.106
1	212.248
1	107.543
1	168.32
1	226.088
1	230.902
2	111.756
1	345.235
1	211.646
1	124.994
1	192.39
1	126.198
1	112.959
1	146.055
1	209.239
1	183.364
1	247.751
1	87.6857
1	233.309
1	193.594
1	135.826
2	223.681
2	142.445
2	95.5085
2	218.266
2	98.5172
2	171.931
2	342.828
2	939.162
2	176.143
2	158.09
2	510.716
2	377.127
2	84.677
2	250.158
2	306.121
2	273.626
2	167.117
2	170.126
2	210.443
2	626.252
2	307.926
2	974.665
2	271.219
2	224.885
2	217.062
2	286.865
2	108.747
2	242.335
2	139.436
2	287.467
2	292.281
2	115.968
2	571.493
2	362.084
2	143.047
2	370.508
2	88.2875
2	116.57
2	613.615
2	252.565
2	369.907
2	94.305
2	94.305
2	251.963
2	506.504
2	237.521
2	292.281
2	406.011
2	449.939
2	193.594
2	409.02
2	239.929
2	162.905
2	124.392
3	142.878
3	130.586
3	75.2716
3	135.502
3	187.129
3	143.492
3	121.981
3	139.805
3	129.356
3	126.898
3	164.389
3	125.669
3	158.857
3	149.024
3	138.575
3	152.097
3	448.334
3	118.294
3	143.492
3	202.494
3	165.003
3	91.2512
3	162.545
3	140.419
3	193.889
3	134.888
3	324.799
3	126.898
3	132.429
3	208.64
3	132.429
3	178.524
3	187.129
3	101.699
3	162.545
3	117.064
3	126.283
3	156.399
3	115.835
3	115.221
3	126.283
3	55.6044
3	125.669
3	77.73
3	99.8556
3	136.732
3	149.024
3	118.908
3	841.063
3	157.013
3	154.555
3	66.6672
3	533.763
3	604.442
3	156.399
3	863.803
3	146.565
3	80.803
3	82.0322
3	205.567
3	213.557
3	112.148
3	81.4176
3	332.789
3	53.146
3	142.263
3	106.002
3	170.535
3	178.524
3	331.56
3	120.137
3	39.6248
3	302.674
3	628.412
3	211.713
3	234.453
3	94.3242
3	113.377
3	15.0408
3	150.253
3	218.473
